# Supplementary material for: Synthesis and Helium Separation Performance of Polycrystalline Membranes of the High Precision Molecular Sieve MIL-116(Ga)
Source: Research Square preprint supplement (doi:10.21203/rs.3.rs-7196877/v1), 2025-07-30
Supplement: Supplementary file 1 [file b8c34f292f7ed4a2e3c3d7be.docx]

**Supporting Information**

**Synthesis and Helium Separation Performance of Polycrystalline Membranes of the High Precision Molecular Sieve MIL-116(Ga)**

*Ayisha Komal1, Laura Calderón-Rodríguez2, Franziska Scheffler1, Eren Grossmann1, Roman Sajzew3, Ralf Wyrwa4, Thomas Hoyer4, Felix H. Schacher2,5,6, Alexander Knebel1,5 **

1 Otto Schott Institute of Materials Research, Friedrich Schiller University of Jena, Center for Energy and Environmental Chemistry II, Lessingstraße 12-14, 07743 Jena, Germany

2 Institute of Organic Chemistry and Macromolecular Chemistry (IOMC), Friedrich-Schiller-University Jena, Humboldtstraße 10, 07743 Jena, Germany

3 Leibniz Institute of Photonic Technology, Albert-Einstein-Straße 9, 07745 Jena, Germany

4 Fraunhofer Institute for Ceramic Technologies and Systems, Michael-Faraday-Straße 1, 07629 Hermsdorf, Germany

5 Center for Energy and Environmental Chemistry, Friedrich Schiller University Jena, Philosophenweg 7a, 07743 Jena, Germany

6 Helmholtz Institute for Polymers in Energy Applications Jena (HIPOLE Jena), Lessingstraße 12-14, 07743 Jena, Germany

These authors contributed equally.

***Corresponding author:** Alexander Knebel, [alexander.knebel@uni-jena.de](mailto:alexander.knebel@uni-jena.de)

**Contents**

[1 Experimental details: 3](#_Toc203644339)

[1.1 Materials 3](#_Toc203644340)

[1.2 Synthesis of MIL-116(Ga) 3](#_Toc203644341)

[1.3 APTES Functionalization of the support surface: 3](#_Toc203644342)

[1.4 Synthesis of the alumina supported MIL-16(Ga) membrane: 3](#_Toc203644343)

[1.5 XRD Characterizations: 4](#_Toc203644344)

[1.6 SEM Characterization 4](#_Toc203644345)

[1.7 Gas Permeation Calculations: 5](#_Toc203644346)

[1.8 Gas Permeation Tests 5](#_Toc203644347)

[2 References 13](#_Toc203644348)

**Figures**

[Figure S 1 XRD patterns of MIL-116(Ga) synthesized with varying metal ion-to-solvent ratios 7](#_Toc203572285)

[Figure S 2 XRD patterns of MIL-116(Ga) with varying synthesis time 8](#_Toc203572286)

[Figure S 3 SEM images of MIL-116(Ga) synthesized with varied reaction time 9](#_Toc203572287)

**Tables**

[Table S 1 Synthesis conditions of MIL-116(Ga) with variation in the molar ratios of the metal ion and organic linker to solvent 6](#_Toc203572280)

[Table S 2 Synthesis conditions of MIL-116 (Ga) with varying reaction time 6](#_Toc203572281)

[Table S 3 Single gas permeance in GPU and the kinetic diameter for the gases. 10](#_Toc203572282)

[Table S 4 Ideal selectivity for the discussed gas pairs calculated from the single gas permeance. 10](#_Toc203572283)

[Table S 5 Comparison of He permeance and He/CH₄ separation performance for various MOF-Based membranes under different operating conditions 11](#_Toc203572284)

## **Experimental details:**

## **Materials**

All chemicals were used as received without further purification. Gallium (III) nitrate hydrate (99.9 %) and Mellitic acid (>98.0 %) were purchased from Thermo Fisher and Tokyo Chemical Industry respectively. Toluene (99.8+ %) and 3-Aminopropyltriethoxysilane (APTES) (99 %) were acquired from Acros Organics. HCl and Acetone were bought from Sigma Aldrich and Supelco, respectively. Porous Al2O3 disks (⌀ = 18 mm and 1 mm thickness) from Fraunhofer IKTS, Germany were used as supports.

## **Synthesis of MIL-116(Ga)**

The synthesis of MIL-116(Ga) was carried out following previously reported procedure1 with slight modifications. First solution of Ga(NO₃)₃·xH₂O (0.4004 g, 1.6 mmol) in 30 mL DI water was prepared and stirred. Mellitic acid (0.2003 g, 0.6 mmol) was then added in the above solution and resulting mixture was transferred into a Teflon-lined autoclave. The autoclave was placed in a furnace and heated at 210°C for up to 24h. The precipitated white particles were collected by centrifugation at 9000 rpm for 15 min, followed by triple washing with DI water and drying at 40°C for 24 h. Additionally, the influence of altering synthesis parameters on MOF synthesis were investigated by varying the molar ratios of the metal ion and organic linker to solvent, as well as varying reaction time.

## **APTES Functionalization of the support surface:**

Porous Al2O3 disks (Fraunhofer IKTS Hermsdorf, ⌀ = 18 mm, d = 1 mm (d = thickness) were first cleaned with acetone to remove any organic contaminants. After this, disks were activated in HCl (6 mol%) for 15 min and then washed with water until neutral and dried. Then activated substrates were immersed in 1.3 ml APTES and 30 ml toluene mixture at 130 °C for 30 min to facilitate the deposition of the APTES layer onto the surface of the disks.

## **Synthesis of the alumina supported MIL-16(Ga) membrane:**

MIL-116(Ga) alumina supported membrane was synthesized solvothermal by secondary growth in a Teflon-lined autoclave. A Teflon insert was used as a sample holder to synthesize counter-gravity with the disk top-down. This helps to avoid particulate on the membrane and growth of extremely large films inside Teflon-lined autoclave. The solution in autoclave was prepared following same procedure described for the synthesis of MIL-116 in Section (1.2). The autoclave was heated to 210 °C for 8 h. Reaction time was optimized for membrane synthesis and reduced from 24 h to 8 h to get uniform MOF layer on alumina surface. A homogenous and defect-free MIL-16-Ga membrane was obtained after washing with DI water and drying at room temperature for 24 h.

## **XRD Characterizations:**

XRD measurements were conducted using Rigaku MiniFlex diffractometer equipped with 600 W X-ray generator (Cu Kα X-ray radiation, λ = 1.54 Å). Measurements were performed using Bragg–Brentano geometry in a 2θ range of 5.00 °2θ to 40.00 °2θ, with a step size of 0.02 °2θ. For morphologic investigation, samples were characterized by using a low-vacuum scanning electron microscope (JEOL 6510LV) with 30 kV acceleration voltage and 40 Pa pressure. A thin layer of platinum was sputter-coated on on samples to enhance conductivity.

## **SEM Characterization**

SEM analysis of top-view and tilted cross-sections of the MIL-116(Ga) membrane were taken on a low-vacuum scanning electron microscope (JEOL 6510LV) with 10 kV acceleration voltage and 40 Pa pressure using the back-scattered electron detector. For better imaging the membrane film, sputtering 15 nm Au with a Leica EM ACE600 Sputter-Coater was applied and the sample was further conducted.

Surface morphology and elemental composition were investigated using a TESCAN MIRA field emission scanning electron microscope (FE-SEM) equipped with a Schottky field emission cathode and operated via TESCAN Essence™ software (TESCAN ORSAY HOLDING, Brno, Czech Republic). The instrument is equipped with an integrated TESCAN EDS detector, allowing for simultaneous imaging and elemental mapping.

Secondary electron (SE) images were acquired at an accelerating voltage of 5–20 kV and a working distance of approximately 15 mm. Imaging was conducted under high-vacuum conditions using a standard Everhart–Thornley SE detector.

Elemental analysis and EDS mapping were performed at an accelerating voltage of 15–20 kV, depending on the required excitation energy for the respective elements. The EDS system was calibrated using manufacturer standards, and data were processed using the built-in analysis tools of the Essence™ software package. Spectra were collected over appropriate acquisition times to ensure sufficient count statistics, and mappings were performed on regions of interest with appropriate dwell times and pixel resolution settings.

All samples were mounted on standard aluminum stubs using conductive carbon tape and silver conductive paste (Acheson Silver DAG 1415, Sigma-Aldrich G3692) and coated with a thin layer of gold (15 nm) using a sputter coater (Leica EM ACE600) to reduce charging effects during analysis.

## **Gas Permeation Calculations:**

Gas permeance (∏) in GPU (**1 GPU** = 1 × 10–6cm3(STP) (cm-2s-1cmHg -1)) was calculated using equation (1)

**(1)**

where (n) is flow rate of gas(i), (A) is membrane area and (ΔP) is transmembrane pressure difference of gas component i.

The selectivity (α) of membrane for mixed gas permeation was determined by using following equation (2)

**(2)**

where  and  represents the molar fractions of components *i* and *j*, respectively, on the feed and permeate sides.

## **Gas Permeation Tests**

Custom-built Wicke Kallenbach set-up was used to evaluate single gas and mixed gas permeation performance of synthesized membranes. MIL-116 (Ga) membranes were secured in a stainless-steel membrane cell, sealed gas tight using Viton® O-rings. Prior to gas measurements, the membranes were activated under a hydrogen gas flow at 100 °C for 10 min. For the single gas (He, H2, N2, CO2 and CH4) permeation, the feed flow rate was set to 100 ml/min. For the mixed gas (He/H2, He/CO2, He/N2, He/CH4, H2/CO2, H2/N2, H2/CH4) permeation measurement, a 1:1 mixture of gas was supplied to the feed side (effective membrane area: 2.01 cm2 ) at room temperature and the feed flow rate was kept constant at 100 ml/min(50 ml/min for each gas). To mimic real life, He separation condition (4:96 He:CH4 mixture), He and CH4 were introduced at respective flow rates of 4 ml/min and 96 ml/min. N2 at the flow rate of 100 ml/min was used as sweep gas on the feed side except during N2 measurements, where CH4 is used as sweep gas.Permeate composition was analysed by a Shimadzu GC-2030 Nexis gas chromatography system.

Table S 1 Synthesis conditions of MIL-116(Ga) with variation in the molar ratios of the metal ion and organic linker to solvent

| MIIL-116(Ga) | Ga(NO3)3·xH2O  / g | Mellitic Acid  / g | DI Water  / ml |
| --- | --- | --- | --- |
| MIL-116(Ga-1:1-H2O) | 0,8001 | 0,3991 | 10 |
| MIL-116(Ga-1:2-H2O) | 0,4004 | 0,2 | 10 |
| MIL-116(Ga-1:4-H2O) | 0,200 | 0,0997 | 10 |

Table S 2 Synthesis conditions of MIL-116 (Ga) with varying reaction time

| MIL-116(Ga) | Ga(NO3)3·xH2O  / g | Mellitic Acid  / g | DI Water  / ml |
| --- | --- | --- | --- |
| MIL-116(Ga)-4h | 0,8001 | 0,3996 | 10 |
| MIL-116(Ga)-8h | 0,8001 | 0,4002 | 10 |
| MIL-116(Ga)-16h | 0,8006 | 0,4001 | 10 |





Figure S 1 XRD patterns of MIL-116(Ga) synthesized with varying metal ion-to-solvent ratios





Figure S 2 XRD patterns of MIL-116(Ga) with varying synthesis time


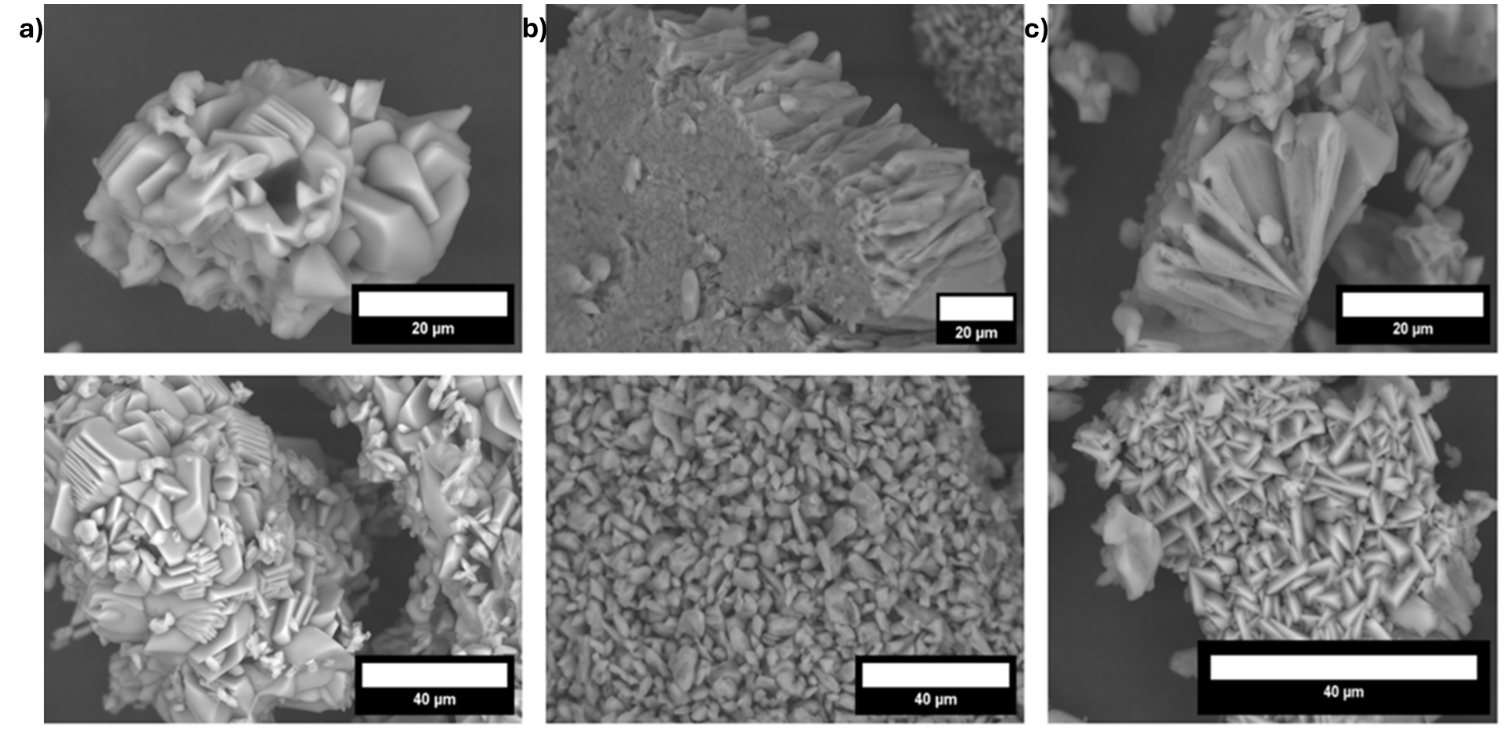


Figure S 3 SEM images of MIL-116(Ga) synthesized with varied reaction time

The effect of different time durations is noticeable in the MIL-116 (Ga) synthesis. Large crystals after 16h of reaction time (c), irregularly shaped particles due to incomplete crystallization in a 4h synthesis reaction (a), are not suitable for membrane synthesis. The optimal synthesis reaction time, as inferred from the above image is 8 h, producing small, well-defined crystal structures that assist homogenous layer formation as mentioned in (**Figure 1a**).

Table S 3 Single gas permeance in GPU and the kinetic diameter for the gases.

| **Gas** | **Kinetic Diameter**  **/ Å** | **Single Gas Permeance / GPU** |
| --- | --- | --- |
| **He** | 2,6 | 449,29 |
| **H2** | 2,89 | 864,11 |
| **CO2** | 3,2 | 79,42 |
| **N2** | 3,4 | 63,99 |

Table S 4 Ideal selectivity for the discussed gas pairs calculated from the single gas permeance.

| **Gas pair** | **Ideal Selectivity**  **αideal(P*i*/P*j*)** | **Knudsen Selectivity**  **αKndusen(P*i*/P*j*)** |
| --- | --- | --- |
| He/H2 | 1,47 | 1,4 |
| H2/CO2 | 8,3 | 3,3 |
| H2/N2 | 13,5 | 2,6 |
| H2/CH4 | 116,2 | 2 |
| He/CO2 | 5,7 | 4,7 |
| He/N2 | 9,1 | 3,7 |
| He/CH4 | 78,9 | 2,8 |
|  |  |  |
|  |  |  |

| **Material** | **Temperature / °C** | **Thickness**  **/ (µm)** | **Pressure / bar** | Permeance  **He / GPU** | Selectivity  **α(He/CH4)** |
| --- | --- | --- | --- | --- | --- |
| **IRMOF-3** | 35 | 10 |  | 3046 | 1.6 |
| **IRMOF-3-AM6** |  |  |  | 2416 | 1.32 |
| **[Cu2(bza)4(pyz)]n** | 20 | 160 |  | 7.9 | 7.33 |
| **Cu-BTC** |  | 25-30 |  | 4140 | 2.14 |
| **ZIF-8-DS** | 35 | 2.5 |  | 565 | 4.65 |
| **ZIF-8-UT** | 25 | 80 |  | 126.6 | 4.06 |
| **Fullerene@ZIF-8** | 23 | 0.35 |  | 185.4 | 9.27 |
| **ZIF-76** | 23 |  |  | 79.8 | 4.6 |
| 3.79% C70@ZIF-76 | 23 |  |  | 22.8 | 15.7 |
| ZIF-76-mbIm | 23 |  |  | 980 | 2.0 |
| **3.54% C70@ZIF-76-mbIm** | 23 |  |  | 587 | 2.17 |
| **ZIF-67** | 25 |  |  | 835.6 | 11.5 |
| **ZIF-67** | 25 |  |  | 687.2 | 13 |
| **ZIF-67** | 25- |  |  | 825.3 | 17.98 |
| **ZIF-8-LP** |  |  |  | 90 | 4.49 |
| MIL-116-Ga(1:1) He/CH4 (real) | 35 |  |  | 1808.65 | 200.5  (This work) |
| MIL-116(Ga) (1:1) H2/CH4 (real) | 35 |  |  | 1840.1 (H2) | 206.1  (This work) |
| MIL-116-Ga(4:96)  H2/CH4 (real) | 35 |  |  | 2263.43 | 31.2  (This work) |

Table S 5 Comparison of He permeance and He/CH₄ separation performance for various MOF-Based membranes under different operating conditions

**1 GPU = 3.35 × 10⁻¹⁰ (mol m-²s-1Pa)**

**References**

1 C. Volkringer, T. Loiseau, N. Guillou, G.Férey, D. Popov, M. Burghammer and C. Riekel, *Solid State Sciences*, 2013, **26**, 38–44.

2 Y. Yoo, V. Varela-Guerrero and H.-K. Jeong, *Langmuir*, 2011, **27**, 2652–2657.

3 S. Takamizawa, Y. Takasaki and R. Miyake, *Journal of the American Chemical Society*, 2010, **132**, 2862–2863.

4 F. Cao, C. Zhang, Y. Xiao, H. Huang, W. Zhang, D. Liu, C. Zhong, Q. Yang, Z. Yang and X. Lu, *Industrial & engineering chemistry research*, 2012, **51**, 11274–11278.

5 N. Hara, M. Yoshimune, H. Negishi, K. Haraya, S. Hara and T. Yamaguchi, *Journal of Membrane Science*, 2014, **450**, 215–223.

6 D. Liu, X. Ma, H. Xi and Y. S. Lin, *Journal of Membrane Science*, 2014, **451**, 85–93.

7 J. Han, H. Wu, H. Fan, L. Ding, G. Hai, J. Caro and H. Wang, *Journal of the American Chemical Society*, 2023, **145**, 14793–14801.

8 Zhijun Zhao, Li Ding, Richard Hinterding, Alexander Mundstock, Christopher Belke, Rolf J. Haug, Haihui Wang and Armin Feldhoff, *Journal of Membrane Science*, 2022, **652**, 120432.

9 O. Shekhah, R. Swaidan, Y. Belmabkhout, M. Du Plessis, T. Jacobs, L. J. Barbour, I. Pinnau and M. Eddaoudi, *Chemical Communications*, 2014, **50**, 2089–2092.
